# Supplementary material for: Retracted Article: Metal-free [2+2+1] cycloaddition polymerization of alkynes, nitriles, and oxygen atoms to functional polyoxazoles
Source: Royal Society of Chemistry journal article supplement (doi:10.1039/d0ra04249h), 2020-01-01
Supplement: d0ra04249h1.pdf [file d0ra04249h1.pdf]

## Supporting Information

### **Metal-Free [2+2+1] Cycloaddition Polymerization of Alkynes, Nitriles, and Oxygen Atoms to Functional Polyoxazoles**

*Lichao Dong,\* Tian Lan, Yin Liang, Shifeng Guo, Hao Zhang*

*The 306th Institute of China Aerospace Science & Industry Corp., Beijing, 100074*

\*Corresponding authors.

E-mail: 610557405@qq.com

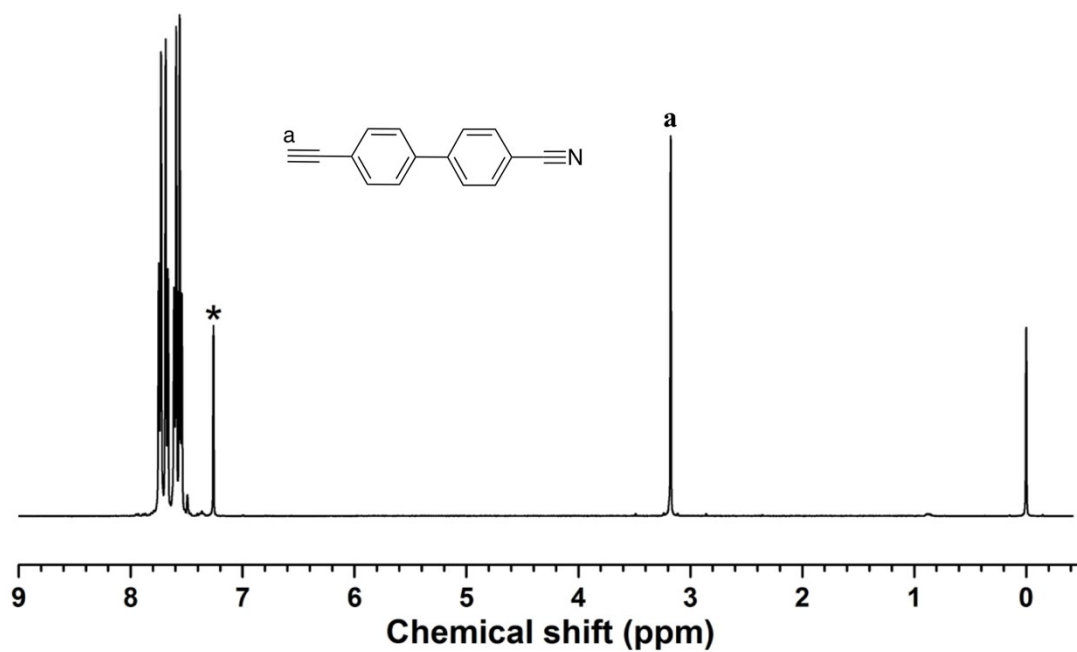

Figure S1 The  $^1\text{H}$ -NMR spectrum of 4-Cyano-4'-ethynylbiphenyl in  $\text{CDCl}_3$ .

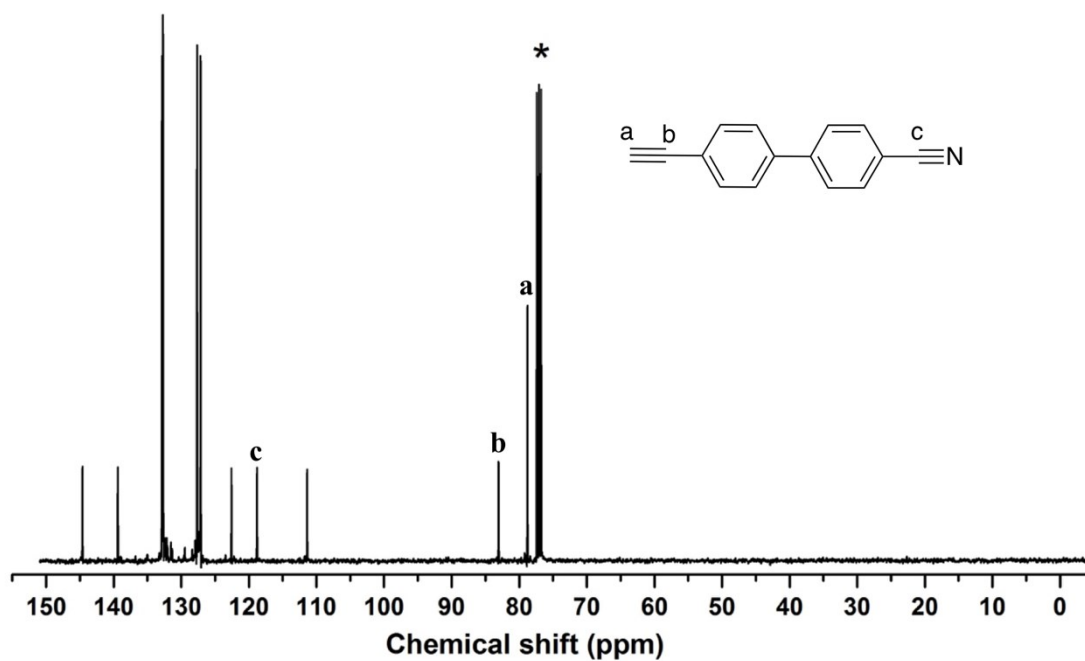

Figure S2 The  $^{13}\text{C}$ -NMR spectrum of 4-Cyano-4'-ethynylbiphenyl in  $\text{CDCl}_3$ .

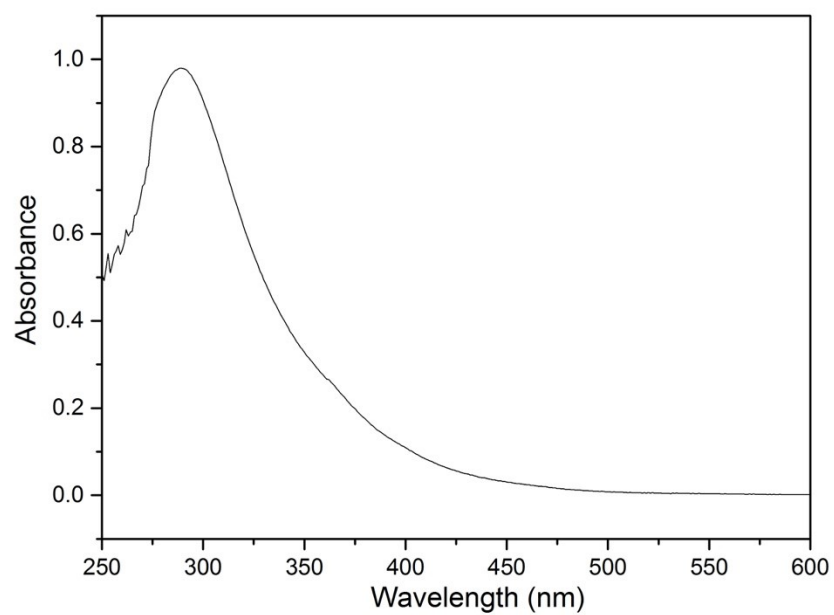

**Figure S3** UV-vis absorbance spectra of the polyoxazoles in THF. Solution concentration:  $1 \times 10^{-4}$  mol / L.

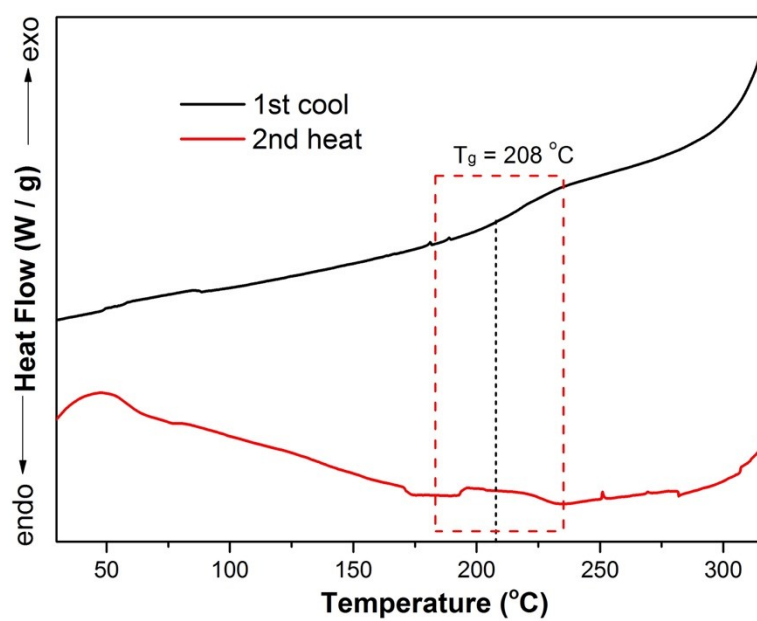

**Figure S4** DSC of the polyoxazoles. The measurements were performed under  $N_2$  atmosphere at the heating rate of  $10 \text{ }^\circ\text{C}/\text{min}$ .

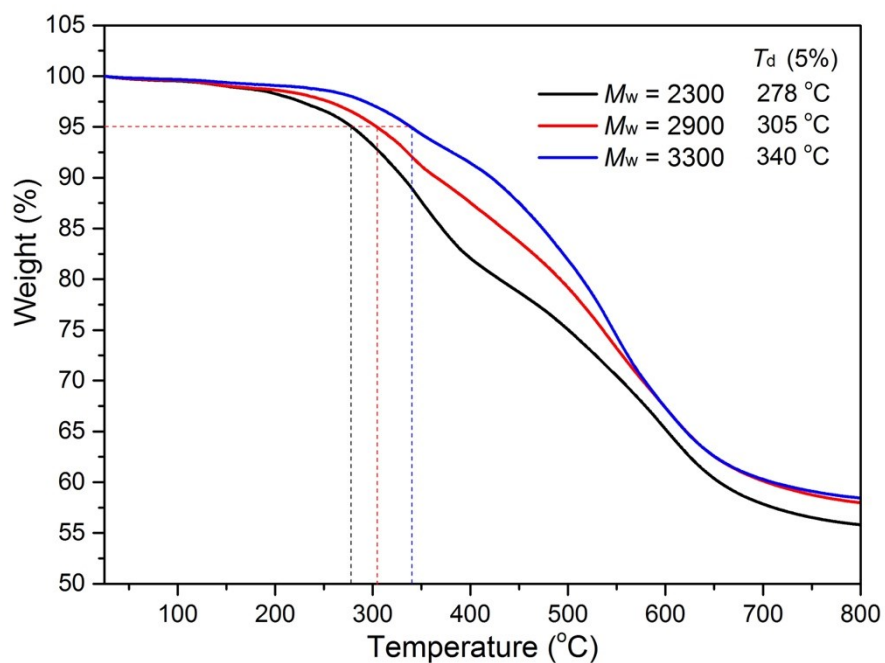

**Figure S5** Thermograms of the polyoxazoles with different number average molecular weight ( $M_w$ ). The measurements were performed under  $N_2$  atmosphere at the heating rate of  $10\text{ °C/min}$ .

**Appendix:**

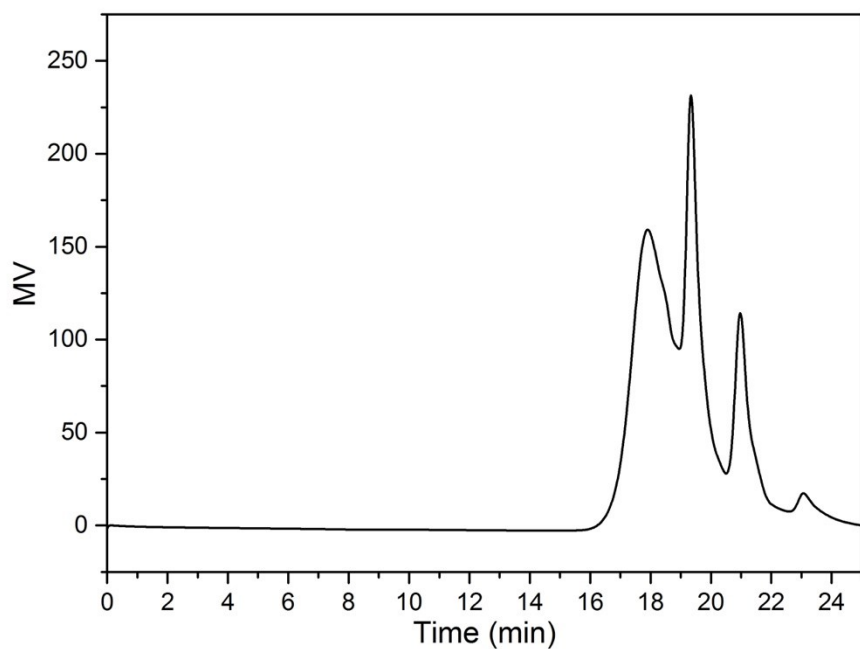

**Figure SA1** The GPC result of entry 1 in Table 1.

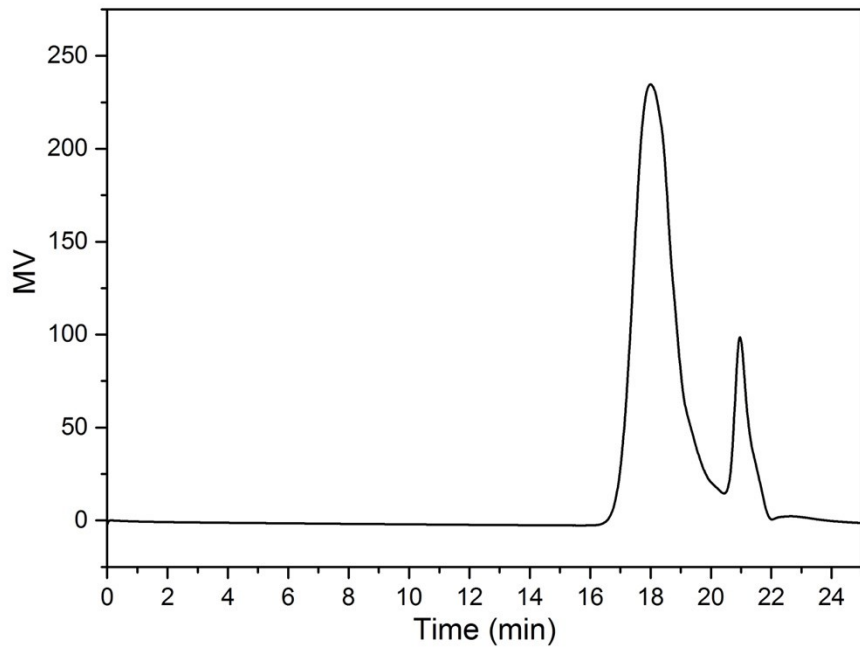

**Figure SA2** The GPC result of entry 2 in Table 1.

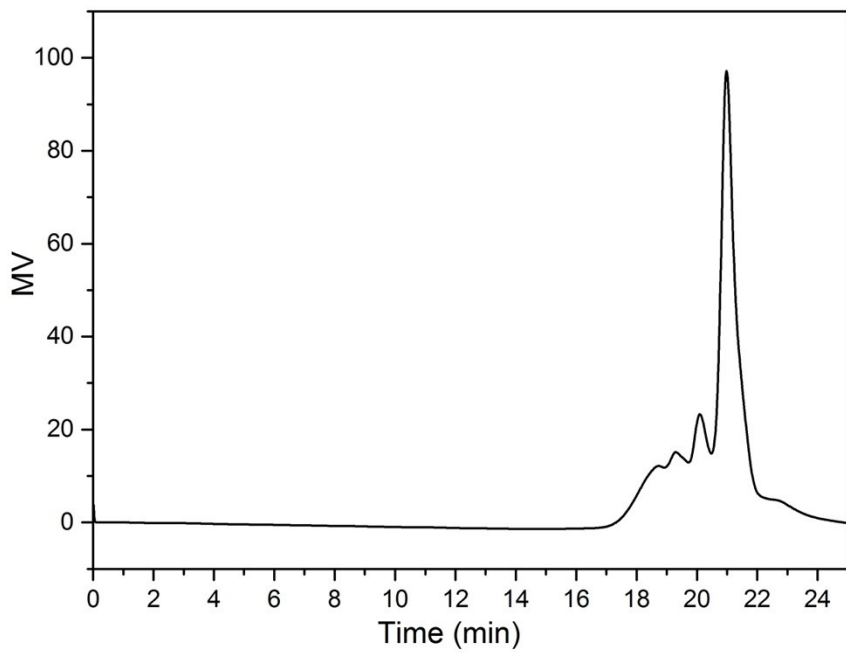

**Figure SA3** The GPC result of entry 3 in Table 1.

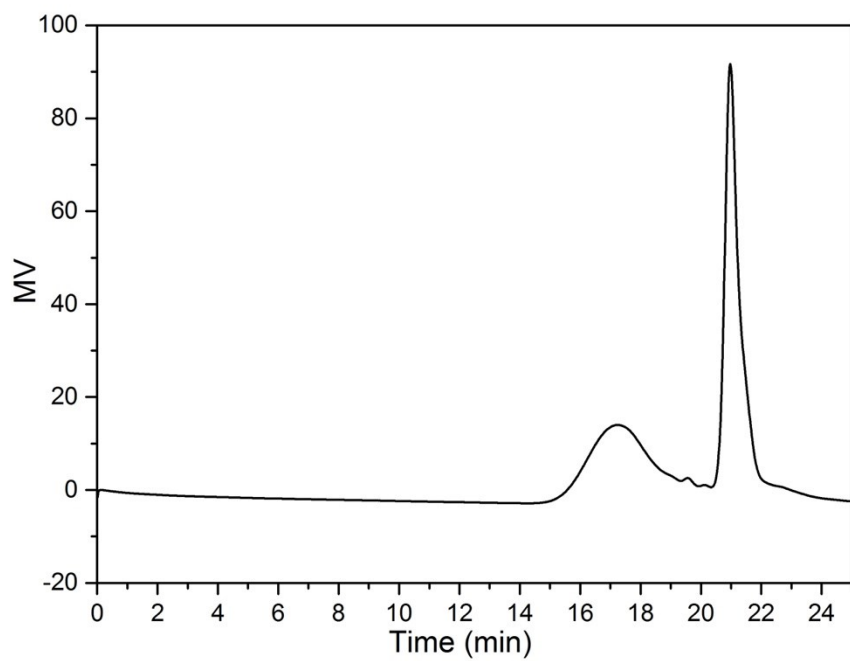

**Figure SA4** The GPC result of entry 4 in Table 1.

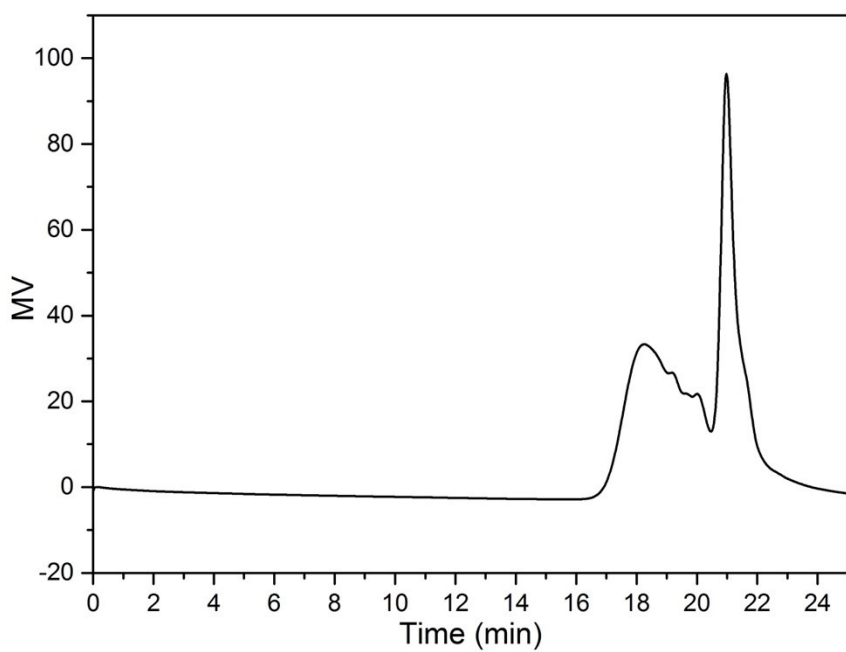

**Figure SA5** The GPC result of entry5 in Table 1.

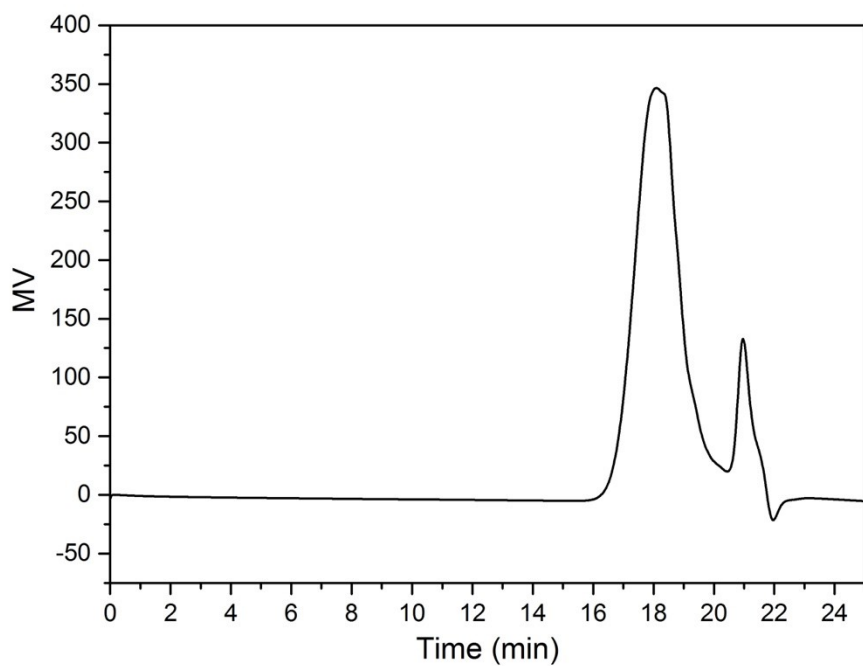

**Figure SA6** The GPC result of entry 1 in Table 2.

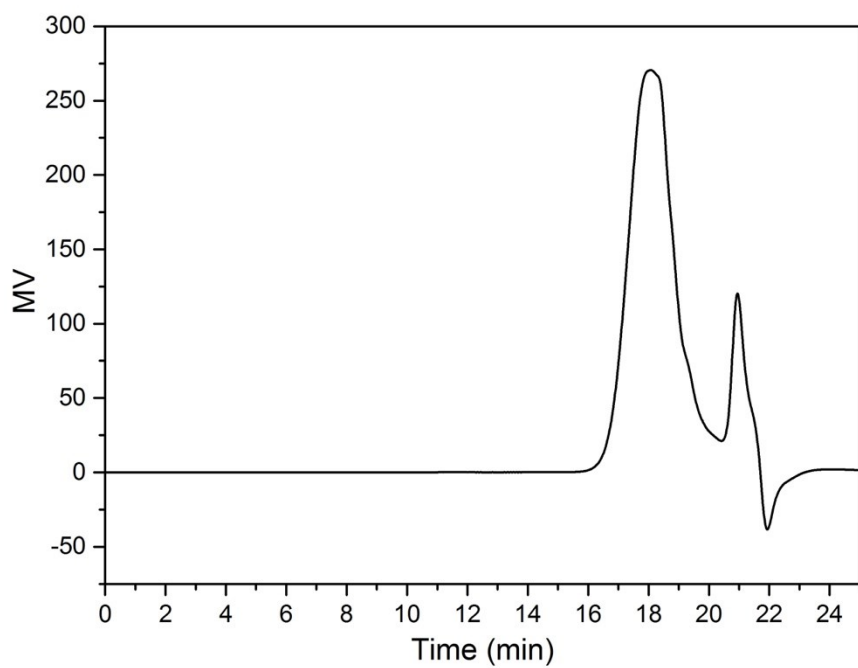

**Figure SA7** The GPC result of entry 2 in Table 2.

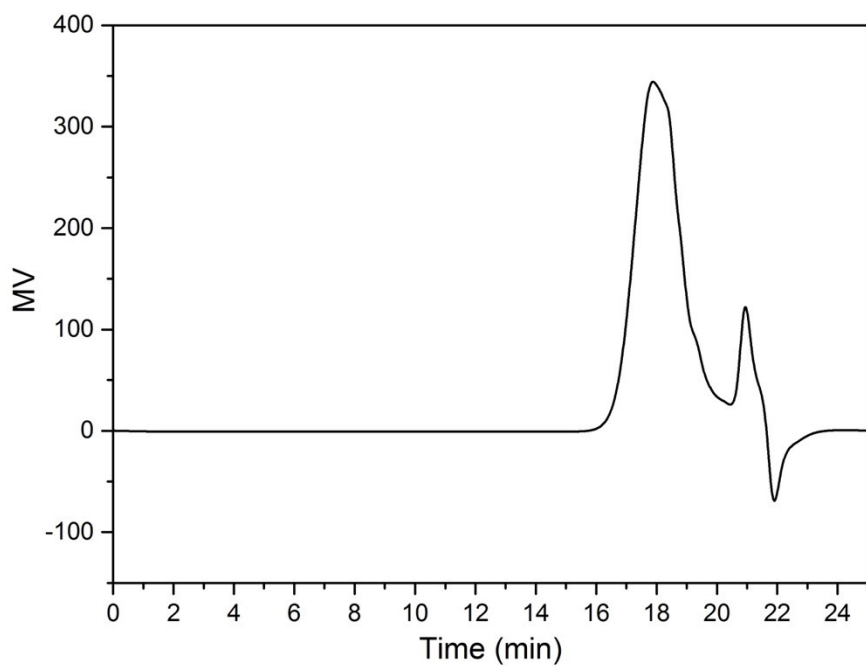

**Figure SA8** The GPC result of entry 3 in Table 2.

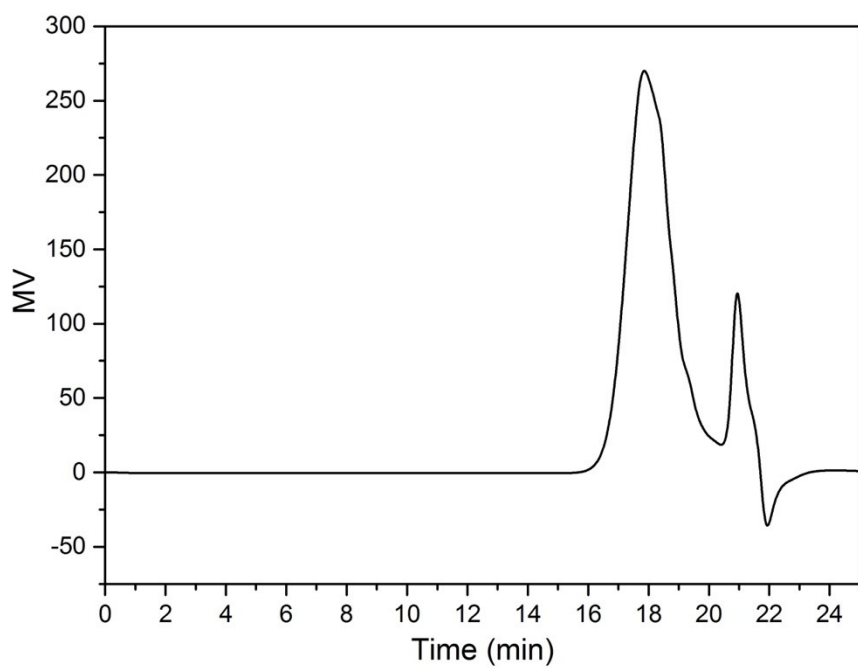

**Figure SA9** The GPC result of entry 4 in Table 2.



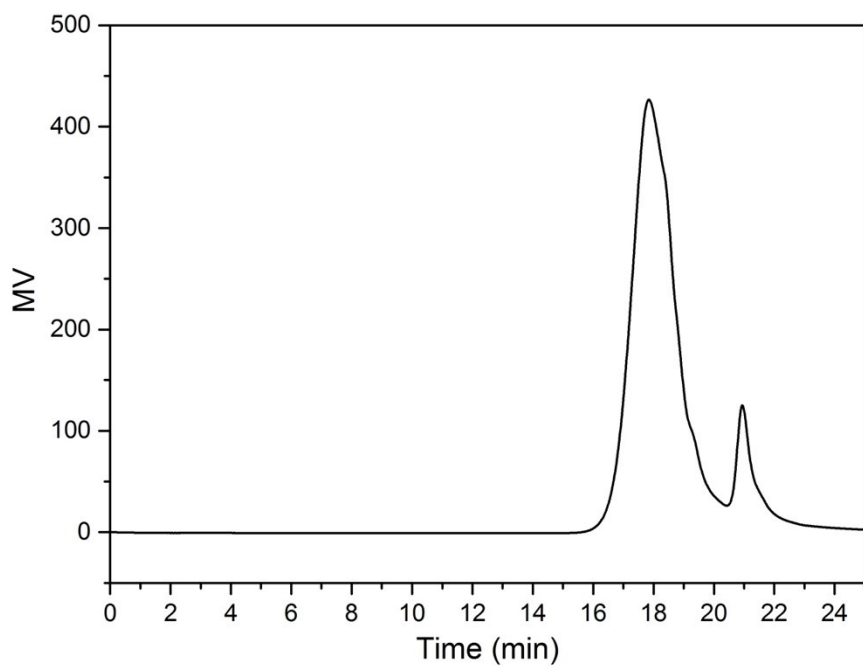

**Figure SA10** The GPC result of entry 5 in Table 2.

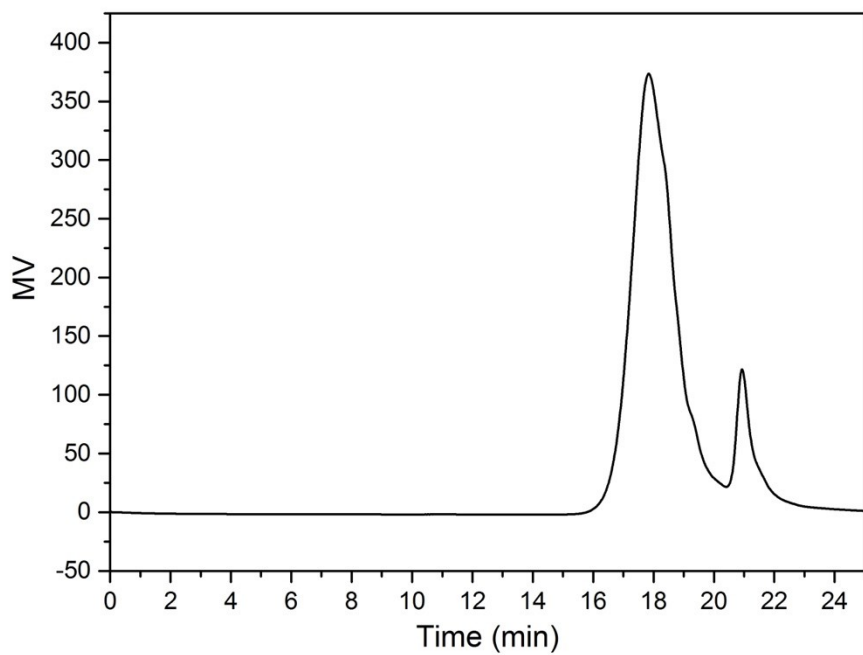

**Figure SA11** The GPC result of entry 6 in Table 2.

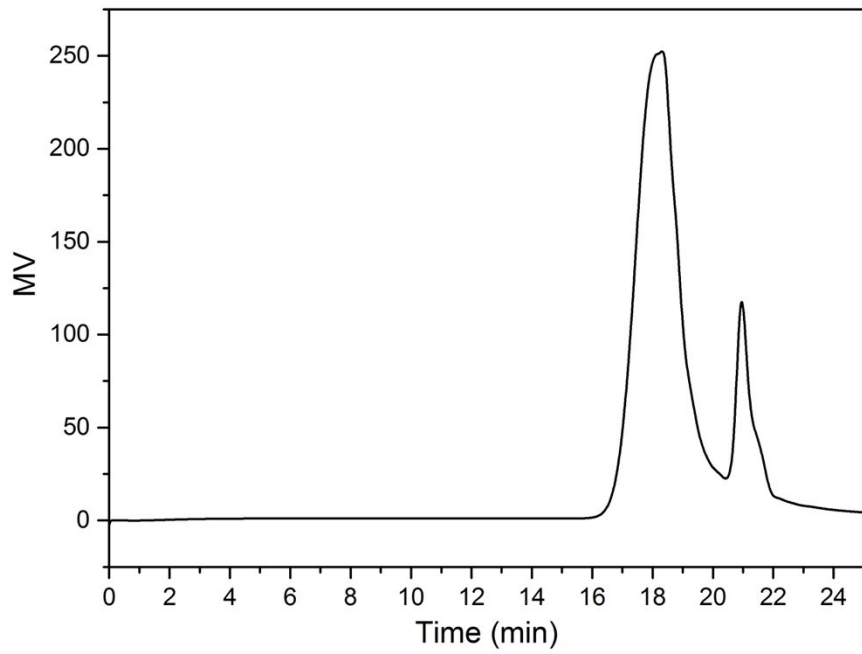

**Figure SA12** The GPC result of entry 1 in Table 3.

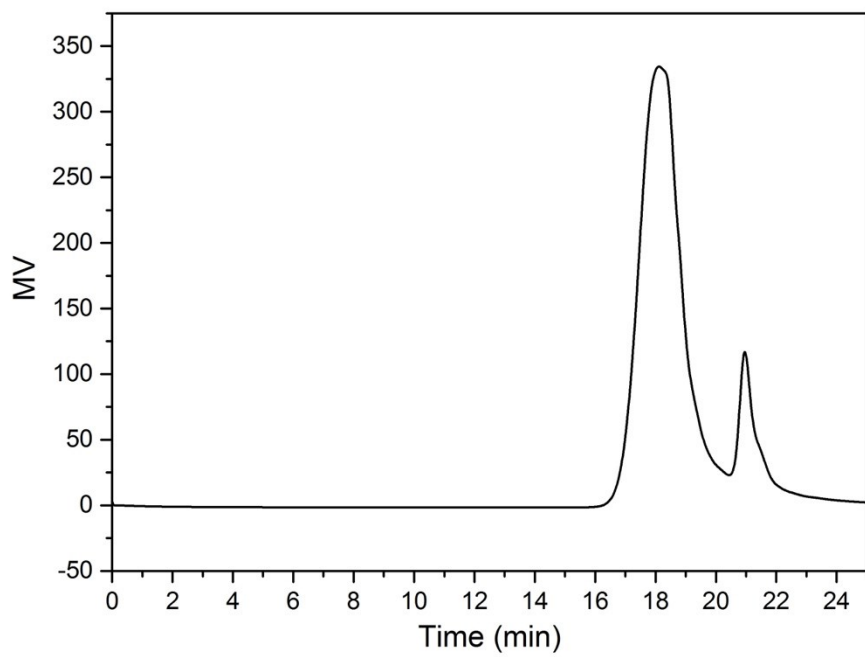

**Figure SA13** The GPC result of entry 2 in Table 3.

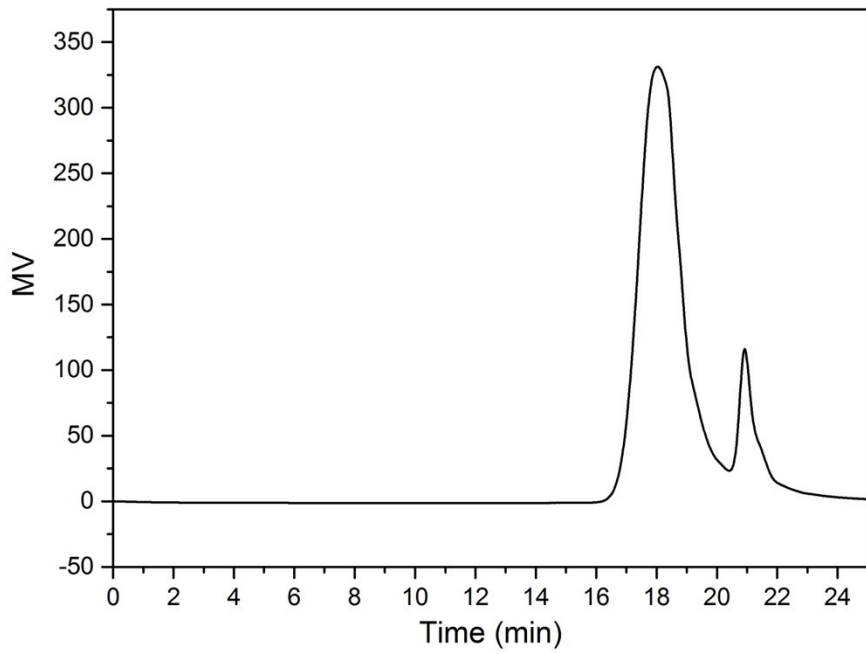

**Figure SA14** The GPC result of entry 3 in Table 3.

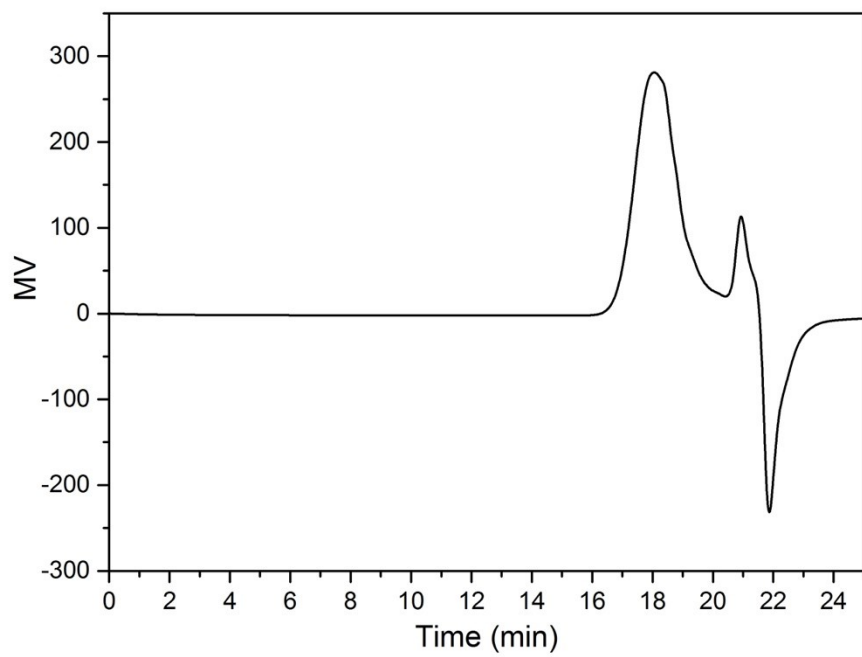

**Figure SA15** The GPC result of entry 4 in Table 3.

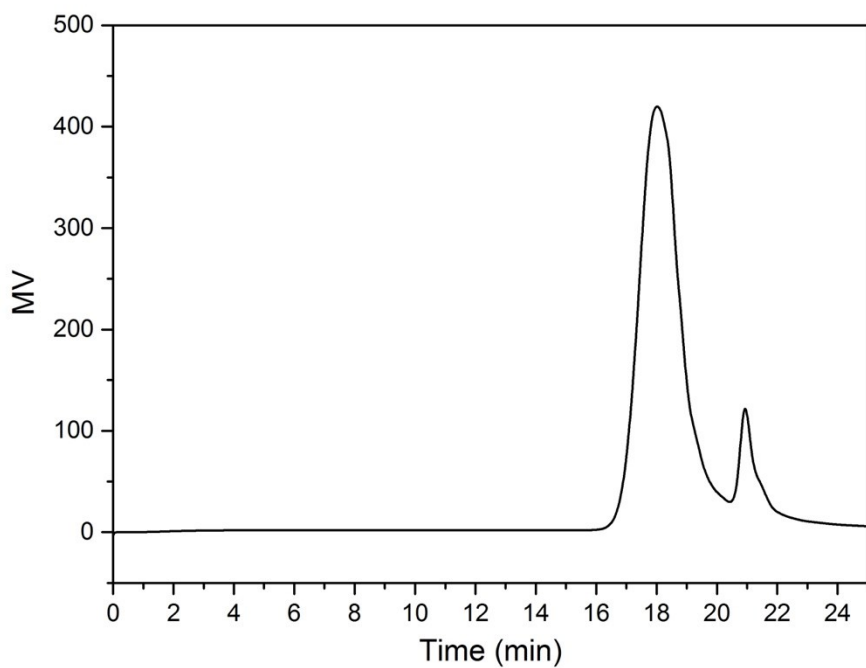

**Figure SA16** The GPC result of entry 5 in Table 3.

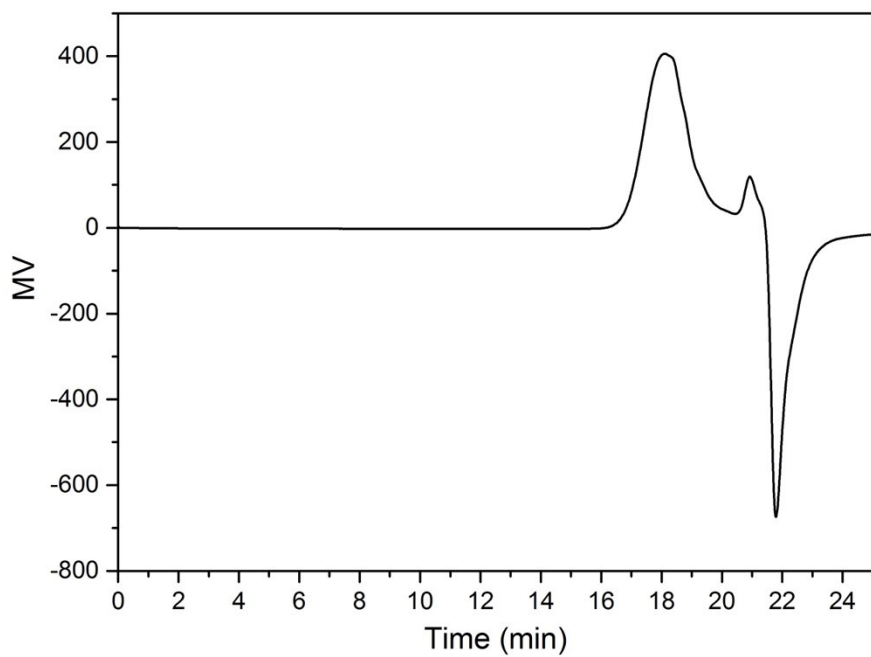

**Figure SA17** The GPC result of entry 6 in Table 3.

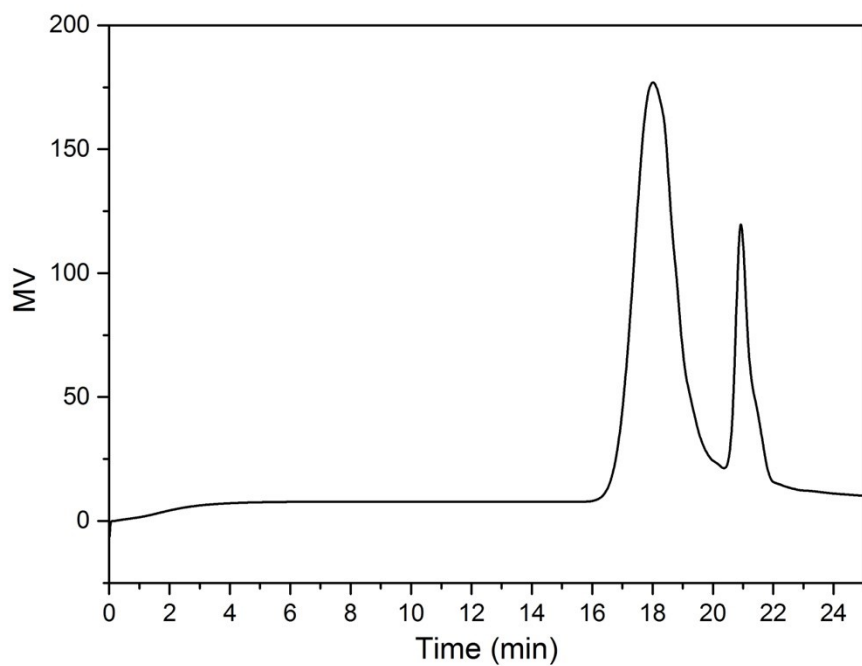

**Figure SA18** The GPC result of entry 7 in Table 3.

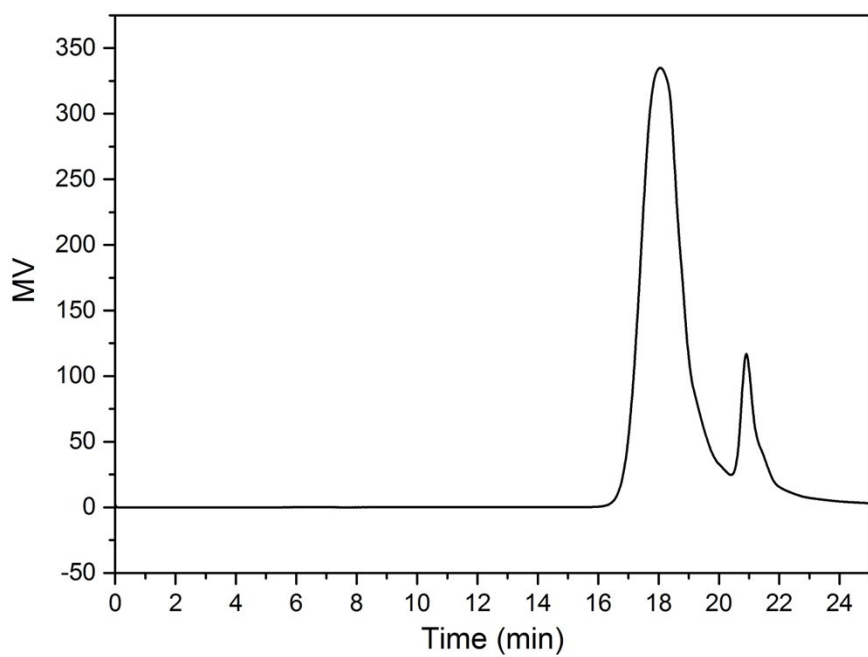

**Figure SA19** The GPC result of entry 1 in Table 4.

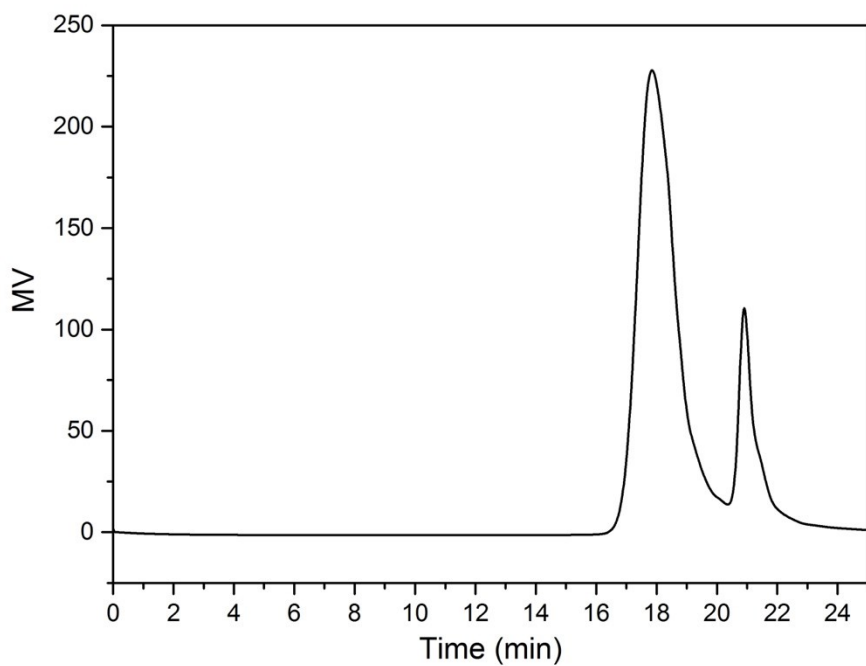

**Figure SA20** The GPC result of entry 2 in Table 4.

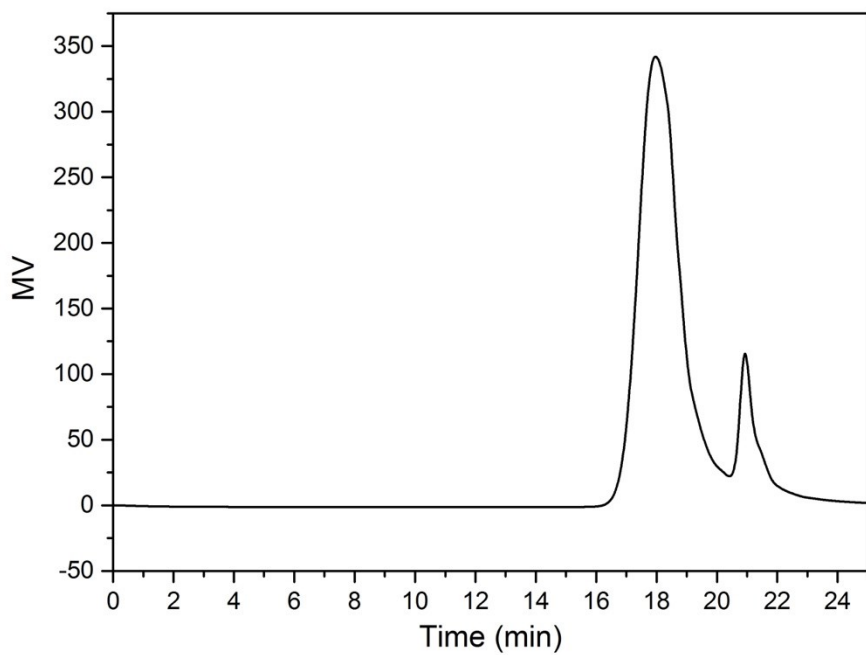

**Figure SA21** The GPC result of entry 3 in Table 4.

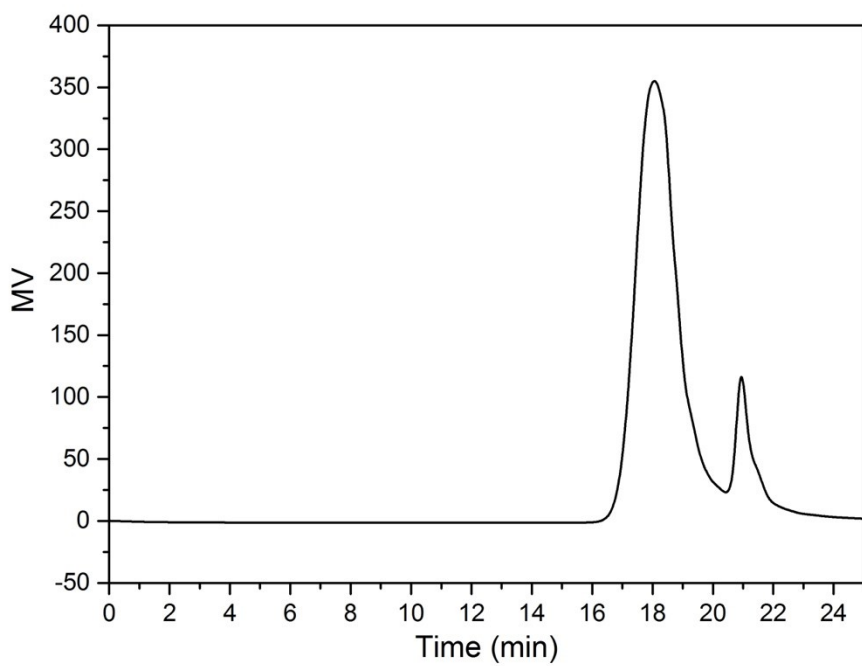

**Figure SA22** The GPC result of entry 4 in Table 4.

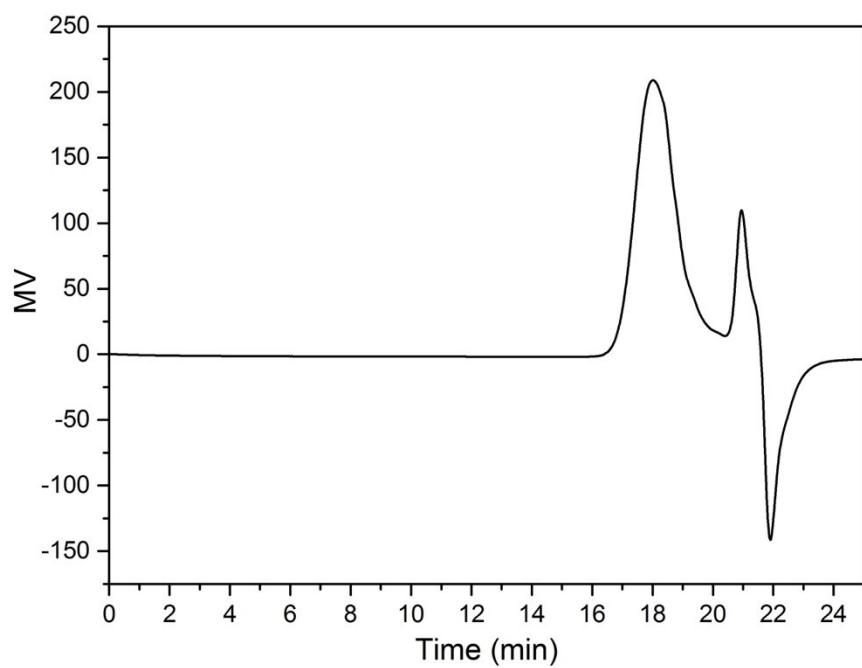

**Figure SA23** The GPC result of entry 5 in Table 4.
